# Supplementary material for: Injectable catechin-based supramolecular hydrogel for highly efficient application in HPV-associated OSCC
Source: Royal Society of Chemistry journal article supplement (doi:10.1039/d2tb01938h), 2022-12-07
Supplement: d2tb01938h1.pdf [file d2tb01938h1.pdf]

Supplementary information

Supplementary information for

## Injectable Catechin-Based Supramolecular Hydrogel for Highly Efficient Application in HPV-associated OSCC

Shangxue Lei,<sup>‡a, b</sup> Xiaopei Hu,<sup>‡a</sup> Shaojuan Song,<sup>a</sup> Yuting Zhang,<sup>a</sup> Hang Zhao,<sup>a</sup>

Xiaoping Xu\*<sup>a</sup> and Hongxia Dan\*<sup>a</sup>

<sup>a</sup> State Key Laboratory of Oral Diseases, National Clinical Research Center for Oral Diseases, Chinese Academy of Medical Sciences Research Unit of Oral Carcinogenesis and Management, Med-X Center for Materials, West China Hospital of Stomatology, Sichuan University, Chengdu, Sichuan 610041, P. R. China.

<sup>b</sup> College of Stomatology, Chongqing Medical University, Chongqing 401147, China.

<sup>‡</sup> These authors contribute equally to this work.

\* These authors are the corresponding authors.

Corresponding E-mails: xiaoping327@126.com; hxdan@foxmail.com

Other E-mails: 2936157197@qq.com; 961862374@qq.com; 1792993297@qq.com; zhangyuting0224@outlook.com; zhaohangahy@scu.edu.cn

The ORCIDiDs are: <https://orcid.org/0000-0001-5598-9731>(Shangxue Lei),

<https://orcid.org/0000-0002-6139-4491>(Xiaopei Hu), <https://orcid.org/0000-0001-7130-3007>(Shaojuan Song),

<https://orcid.org/0000-0001-8009-0840>(Yuting Zhang),

<https://orcid.org/0000-0003-1268-0616>(Hang Zhao), <https://orcid.org/0000-0002-0499-2030>(Xiaoping Xu), and

<https://orcid.org/0000-0002-9765-0012>(Hongxia Dan), respectively.

### Mechanism of ARS color rendering:

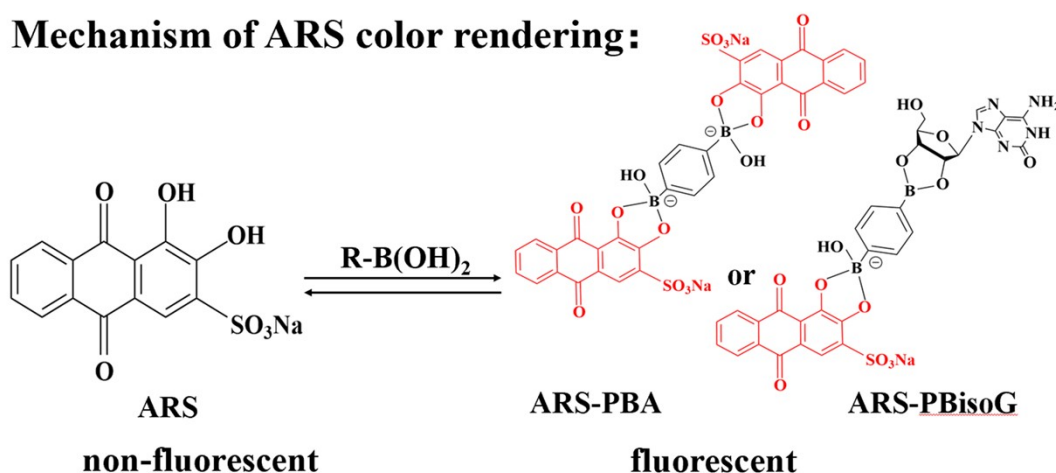

**Scheme S1** The fluorescence generation mechanism of ARS (PBA as an example).

**Table S1. Inhibitory effects of different treatments on HPV<sup>+</sup> OSCC tumour**

| HPV <sup>+</sup> OSCC tumour     | PBS          | 0.05 M 5-FU  | 0.025 M CPBisoG | 0.05 M CPBisoG |
|----------------------------------|--------------|--------------|-----------------|----------------|
| Tumour volume (mm <sup>3</sup> ) | 1585 ± 205.9 | 1025 ± 437.8 | 1127 ± 175.1    | 852 ± 294.9    |
| Tumour inhibition rates (%)      | □            | 35.36        | 28.9            | 46.25          |
| P value (vs PBS)                 |              | 0.043        | 0.141           | 0.019          |

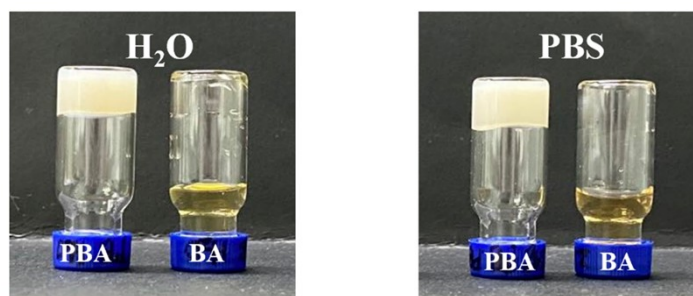

**Fig. S1** PBA was chosen to construct dynamic phenyldiborate ester bonds. The concentration of each component in the experiment is the same, 0.1 M.

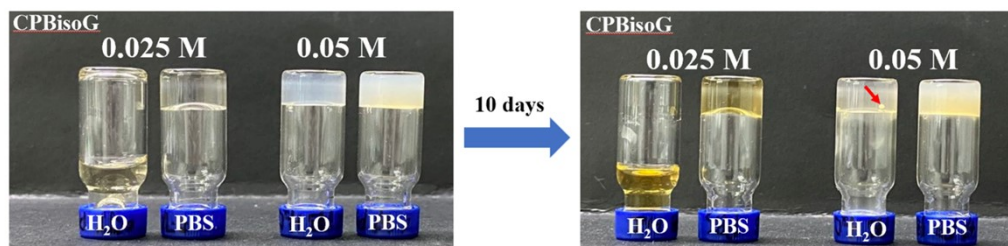

**Fig. S2** PBS was chosen as the solvent of CPBisoG hydrogel system. The critical gelation concentration of CPBisoG in PBS system was 0.025 M, while 0.05 M in the H<sub>2</sub>O system. And on the 10<sup>th</sup> day after gel formation, precipitation was observed in 0.05 M CPBisoG hydrogel with H<sub>2</sub>O as solvent, but not in the equal concentration of CPBisoG hydrogel with PBS as solvent.

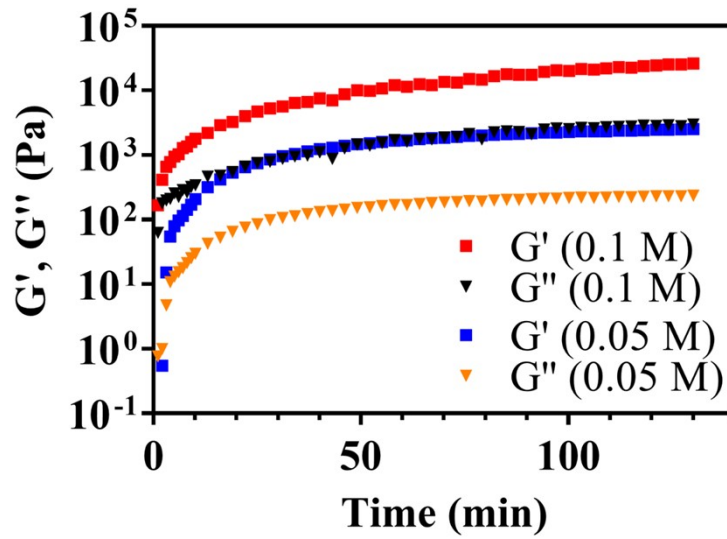

**Fig. S3** The time sweep tests to investigate the viscoelastic properties of 0.05 M and 0.1 M CPBisoG hydrogel. The modulus ( $G'$  and  $G''$ ) were positively correlated with CPBisoG concentration.

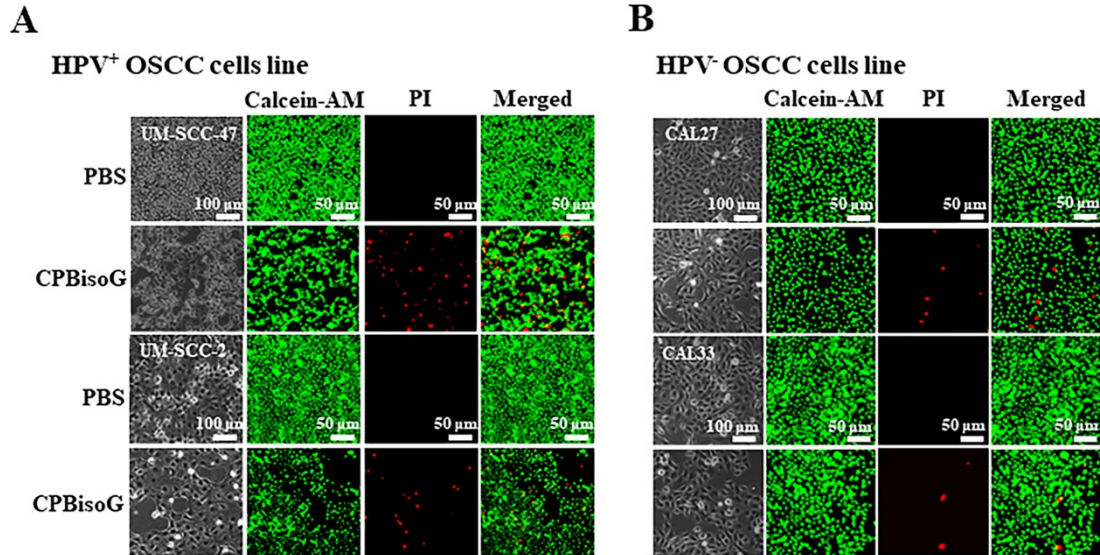

**Fig. S4** Phase-contrast images and the alive/dead cell images costained with calcein-AM (live cells, green) and PI (dead cells, red) of HPV<sup>+</sup> OSCC cell lines (UM-SCC-47, UM-SCC-2) and HPV<sup>-</sup> OSCC cell line (CAL27, CAL 33), which was exposed to 0.5 mM CPBisoG and for 24 h, respectively. PBS as the control. Scale bar: 100  $\mu\text{m}$  and 50  $\mu\text{m}$ , respectively.

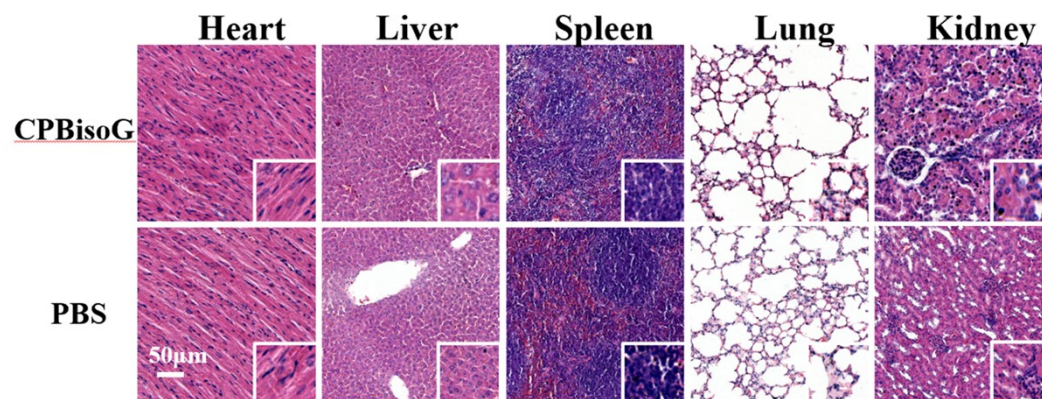

**Fig. S5** H&E staining images of the main organs tissues from the sacrificed mice treated with 0.05 M CPBisoG hydrogel.
